# Supplementary material
Source: Frontiers journal article supplement (https://www.frontiersin.org/articles/430343)
Supplement: Image_2.pdf [file Image_2.pdf]

**A**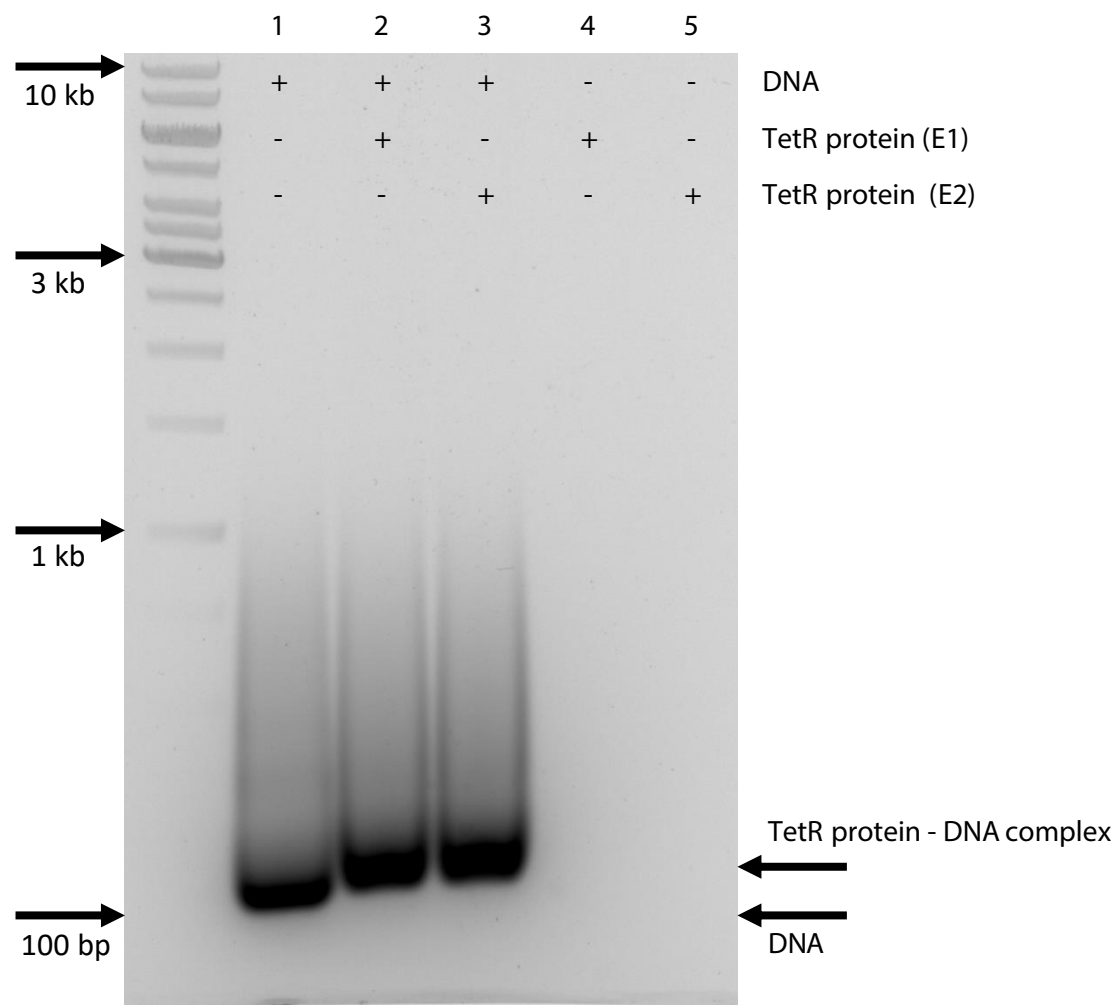**B**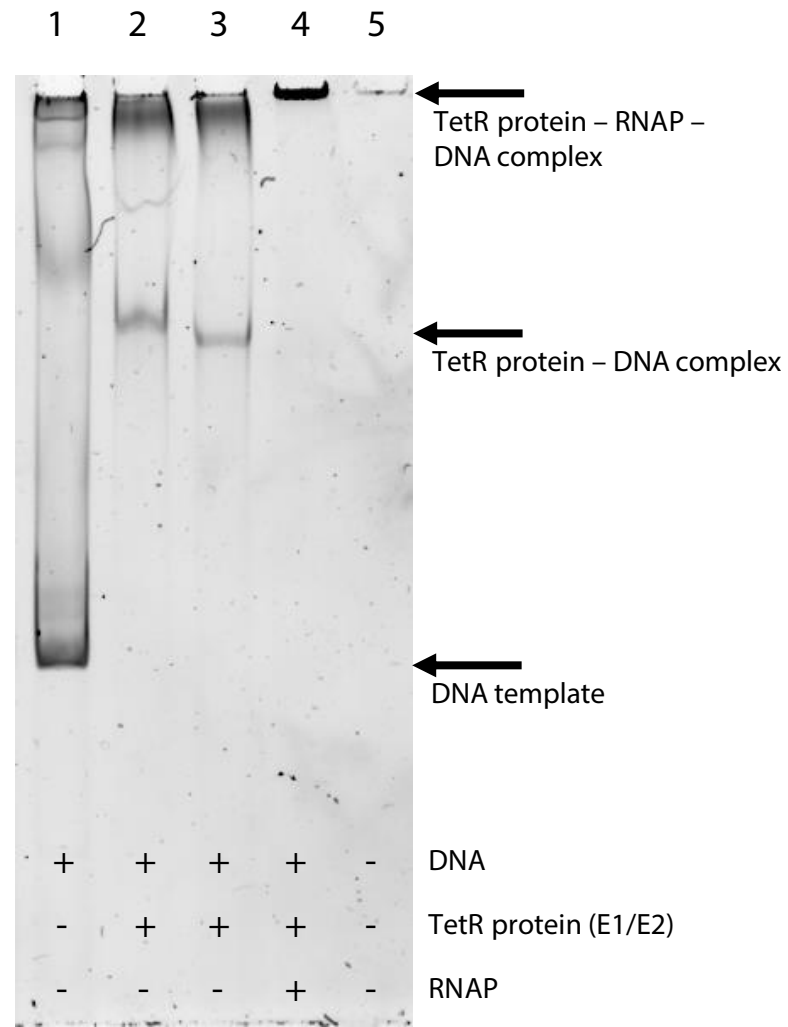

**Supplementary Figure 2. EMSA experiments of DNA-protein interaction of the TetR-family protein (CAETHG\_0459) and the new promoter motif ( $P_{\text{cauto}}$ ) using gel electrophoresis. (A) EMSA in 1 % agarose gel. Two different TetR-family protein (CAETHG\_0459) extracts were tested (E1, E2). The first lane corresponds to a 1 kb gene ruler. (B) EMSA in 7.5 % polyacrylamide gel. The combination of proteins and DNA is shown for each lane: present (+), absent (-). See Methods for experimental details.**
